# Supplementary material for: Advancing COVID-19 diagnosis with privacy-preserving collaboration in artificial intelligence
Source: Springer Nature journal article supplement (doi:10.1038/s42256-021-00421-z), 2021-12-15
Supplement: 42256_2021_421_MOESM1_ESM.pdf [file 42256_2021_421_MOESM1_ESM.pdf]

---

**Supplementary information**

---

**Advancing COVID-19 diagnosis with  
privacy-preserving collaboration in  
artificial intelligence**

---

In the format provided by the  
authors and unedited

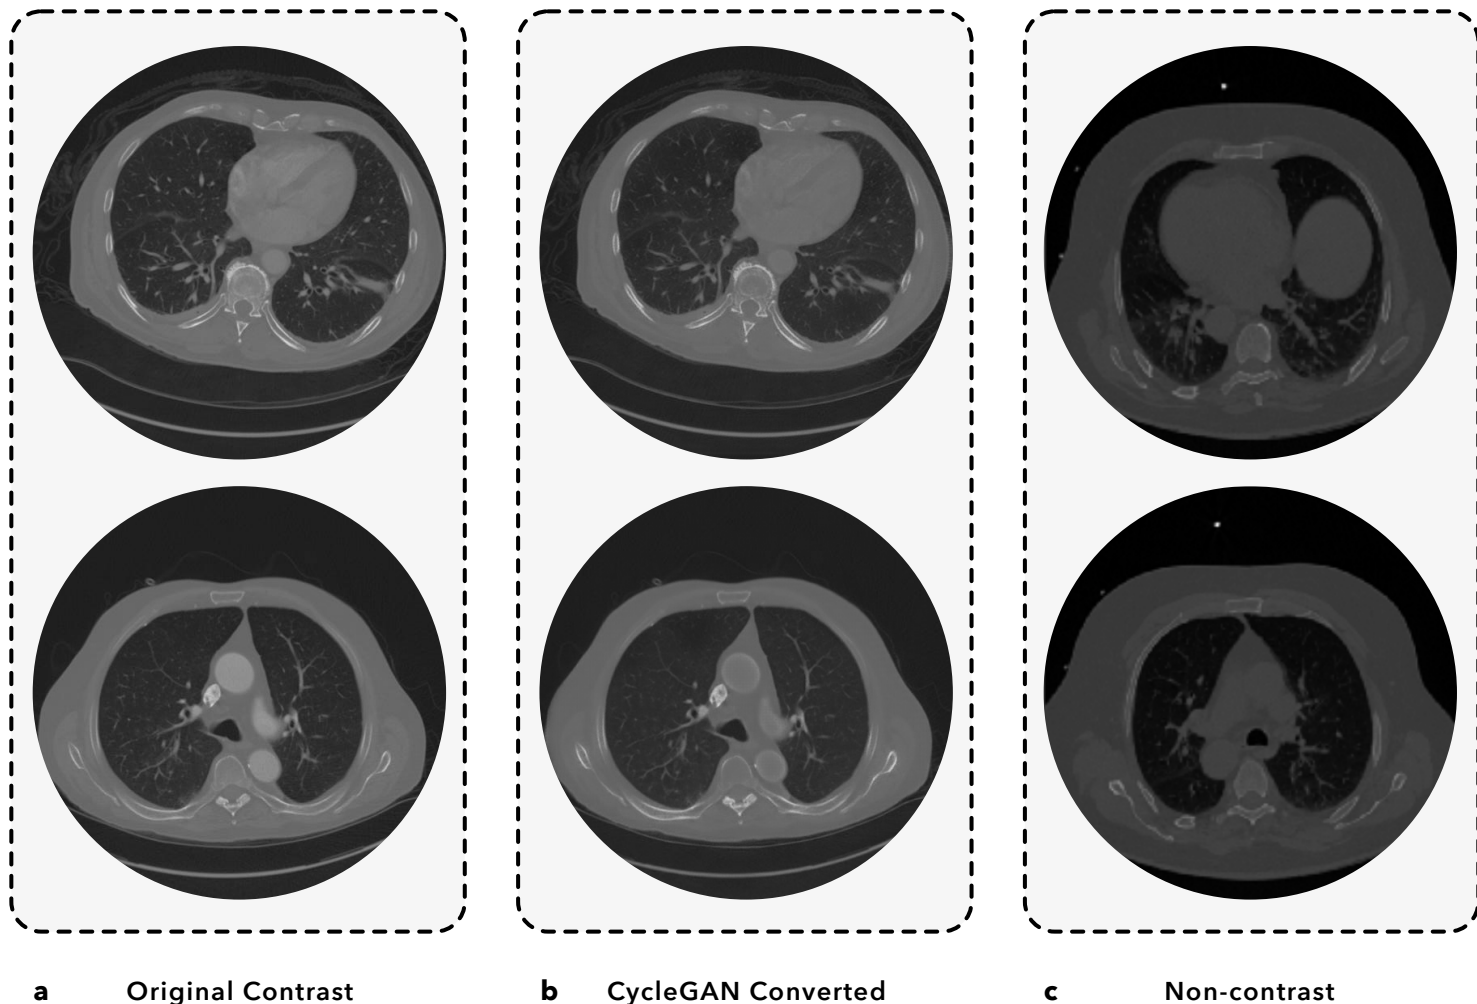

**Supplementary Fig. 1 | Conversion of the contrast CTs with CycleGAN. a,** Contrast CTs (angiography), **b,** Correspondent converted CTs using CycleGAN to reduce the contrastive regions (pointed out by red arrows), **c,** Non-contrast CTs.

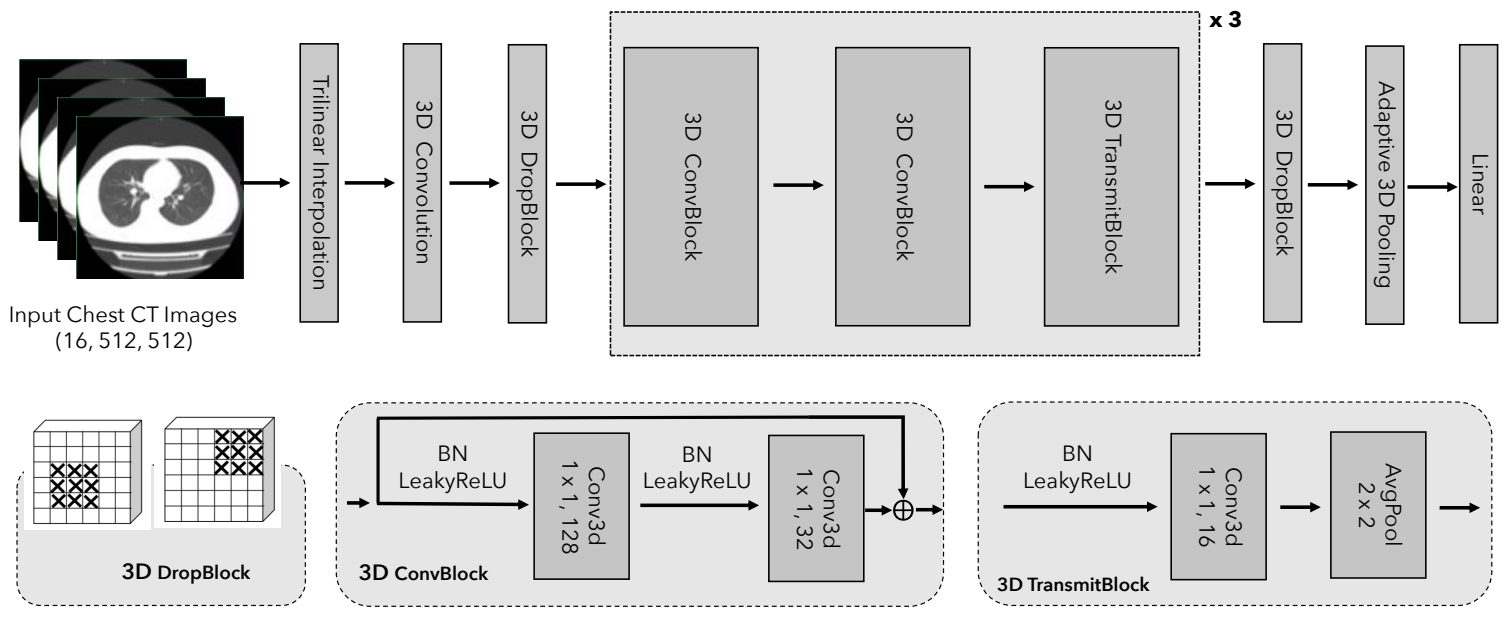

**Supplementary Fig. 2 | Architecture of 3D DenseNet.**

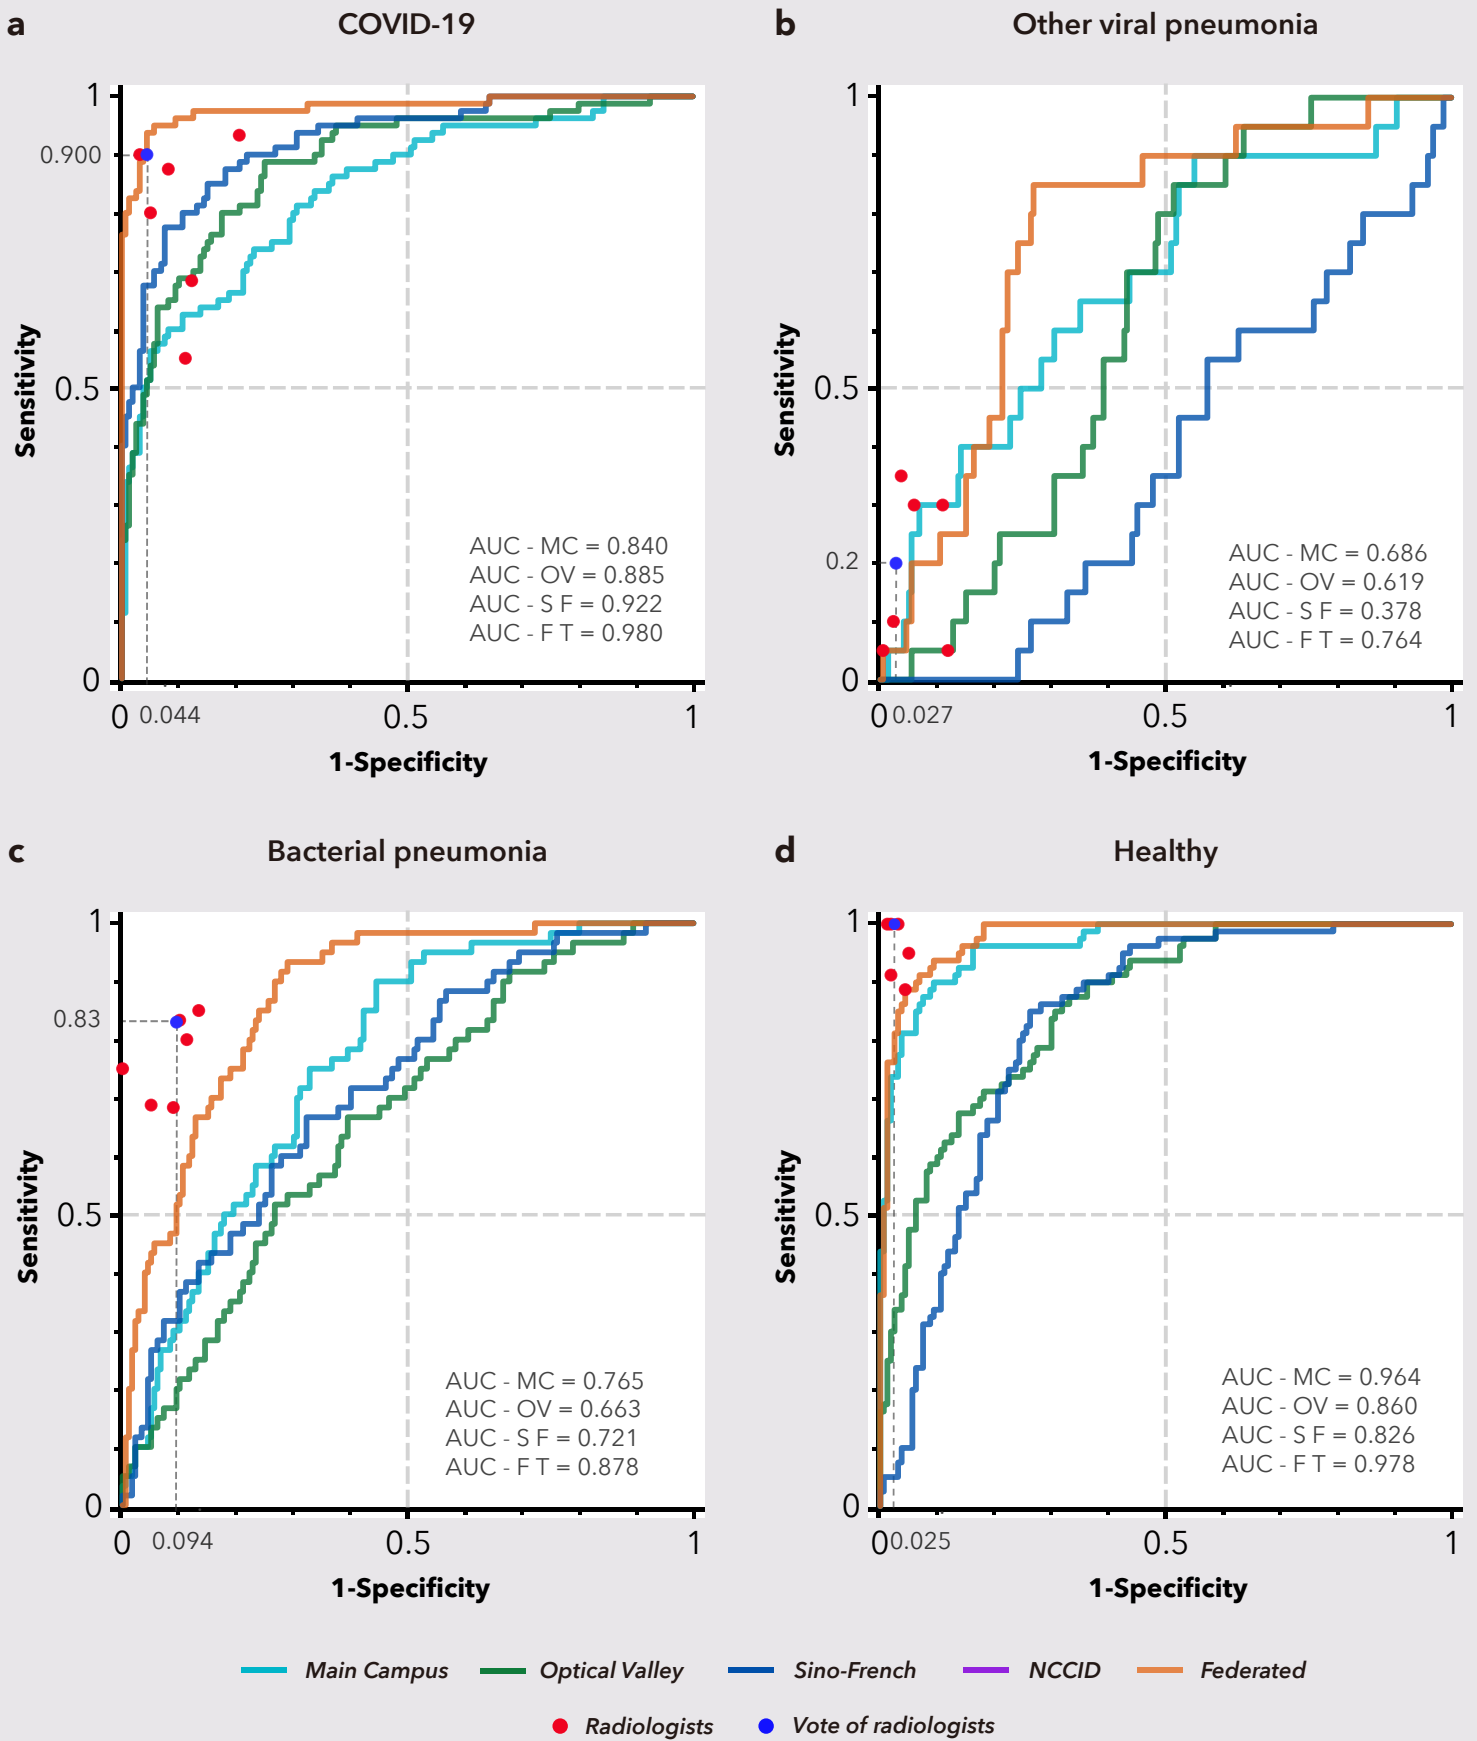

Supplementary Fig. 3 | Detailed model performance on the four-class (a-d) prediction from the China data.

| Train split    |                  |        |      |      |       |       |       |     |                |             |
|----------------|------------------|--------|------|------|-------|-------|-------|-----|----------------|-------------|
| Resource       | Pneumonia cohort | Gender |      | Age  |       |       |       |     | Patient amount | CT amount   |
|                |                  | Female | Male | 0-20 | 20-40 | 40-60 | 60-80 | 80+ |                |             |
| Main Campus    | N/A(healthy)     | 115    | 109  | 18   | 144   | 59    | 3     | 0   | 224            | 727         |
|                | COVID-19         | 66     | 69   | 5    | 39    | 45    | 43    | 3   | 135            | 922         |
|                | Other viral      | 26     | 30   | 0    | 8     | 29    | 19    | 0   | 56             | 250         |
|                | Bacterial        | 118    | 136  | 1    | 47    | 104   | 94    | 8   | 254            | 934         |
| Optical Valley | N/A(healthy)     | 32     | 43   | 8    | 57    | 10    | 0     | 0   | 75             | 278         |
|                | COVID-19         | 54     | 58   | 1    | 16    | 30    | 57    | 8   | 112            | 425         |
|                | Other viral      | 0      | 0    | 0    | 0     | 0     | 0     | 0   | 0              | 0           |
|                | Bacterial        | 1      | 12   | 0    | 1     | 3     | 7     | 2   | 13             | 47          |
| Sino-French    | N/A(healthy)     | 22     | 21   | 1    | 31    | 10    | 1     | 0   | 43             | 131         |
|                | COVID-19         | 85     | 73   | 2    | 30    | 53    | 66    | 7   | 158            | 853         |
|                | Other viral      | 0      | 0    | 0    | 0     | 0     | 0     | 0   | 0              | 0           |
|                | Bacterial        | 10     | 15   | 0    | 8     | 12    | 5     | 0   | 25             | 97          |
| total          |                  |        |      |      |       |       |       |     | <b>1095</b>    | <b>4664</b> |

| Test split     |                  |        |      |      |       |       |       |     |                |             |
|----------------|------------------|--------|------|------|-------|-------|-------|-----|----------------|-------------|
| Resource       | Pneumonia cohort | Gender |      | Age  |       |       |       |     | Patient amount | CT amount   |
|                |                  | Female | Male | 0-20 | 20-40 | 40-60 | 60-80 | 80+ |                |             |
| Main Campus    | N/A(healthy)     | 30     | 28   | 3    | 36    | 19    | 0     | 0   | 58             | 191         |
|                | COVID-19         | 21     | 13   | 1    | 5     | 15    | 11    | 2   | 34             | 191         |
|                | Other viral      | 8      | 11   | 0    | 4     | 9     | 6     | 0   | 19             | 72          |
|                | Bacterial        | 23     | 27   | 0    | 9     | 20    | 21    | 0   | 50             | 170         |
| Optical Valley | N/A(healthy)     | 6      | 6    | 0    | 9     | 3     | 0     | 0   | 12             | 44          |
|                | COVID-19         | 13     | 10   | 0    | 6     | 5     | 11    | 1   | 23             | 88          |
|                | Other viral      | 0      | 0    | 0    | 0     | 0     | 0     | 0   | 0              | 0           |
|                | Bacterial        | 1      | 1    | 0    | 0     | 1     | 1     | 0   | 2              | 8           |
| Sino-French    | N/A(healthy)     | 5      | 5    | 0    | 9     | 1     | 0     | 0   | 10             | 27          |
|                | COVID-19         | 15     | 22   | 0    | 5     | 12    | 19    | 1   | 37             | 244         |
|                | Other viral      | 1      | 0    | 0    | 0     | 1     | 0     | 0   | 1              | 12          |
|                | Bacterial        | 2      | 6    | 1    | 1     | 3     | 3     | 0   | 8              | 29          |
| Tianyou        | COVID-19         | -      | -    | -    | -     | -     | -     | -   | 645            | 645         |
| Union          | COVID-19         | -      | -    | -    | -     | -     | -     | -   | 506            | 506         |
| total          |                  |        |      |      |       |       |       |     | <b>1405</b>    | <b>2227</b> |

**Supplementary Table 1 | Demographical and clinical information of the CN data.**

| Training and validation split |                  |        |      |      |       |       |       |     |                |             |
|-------------------------------|------------------|--------|------|------|-------|-------|-------|-----|----------------|-------------|
| CT Info                       | Pneumonia cohort | Gender |      | Age  |       |       |       |     | Patient amount | CT amount   |
|                               |                  | Female | Male | 0-20 | 20-40 | 40-60 | 60-80 | 80+ |                |             |
| Contrast                      | N/A(healthy)     | 46     | 67   | 0    | 1     | 11    | 62    | 43  | 276            | 1097        |
|                               | COVID-19         | 56     | 88   | 0    | 4     | 35    | 68    | 37  | 145            | 491         |
| Non-Contrast                  | N/A(healthy)     | 21     | 24   | 0    | 1     | 5     | 29    | 10  | 116            | 394         |
|                               | COVID-19         | 21     | 31   | 0    | 0     | 7     | 28    | 17  | 54             | 163         |
| total                         |                  |        |      |      |       |       |       |     | <b>591</b>     | <b>2145</b> |

| Test split   |                  |        |      |      |       |       |       |     |                |            |
|--------------|------------------|--------|------|------|-------|-------|-------|-----|----------------|------------|
| Resource     | Pneumonia cohort | Gender |      | Age  |       |       |       |     | Patient amount | CT amount  |
|              |                  | Female | Male | 0-20 | 20-40 | 40-60 | 60-80 | 80+ |                |            |
| Contrast     | N/A(healthy)     | 29     | 42   | 0    | 0     | 4     | 40    | 27  | 160            | 259        |
|              | COVID-19         | 32     | 51   | 0    | 2     | 20    | 39    | 22  | 83             | 138        |
| Non-Contrast | N/A(healthy)     | 11     | 18   | 0    | 0     | 4     | 14    | 9   | 75             | 103        |
|              | COVID-19         | 11     | 16   | 0    | 1     | 4     | 19    | 5   | 27             | 37         |
| total        |                  |        |      |      |       |       |       |     | <b>345</b>     | <b>537</b> |

**Hospitals Include:** Royal United Hospitals Bath NHS Foundation Trust, Brighton and Sussex University Hospitals NHS Trust, London North West University Healthcare NHS Trust, George Eliot Hospital NHS Trust, Cwm Taf Morgannwg University Health Board, Hampshire Hospitals NHS Foundation Trust, Betsi Cadwaladr University Health Board, Ashford and St Peter's Hospitals, Royal Cornwall Hospitals NHS Trust, Sheffield Children's NHS Foundation Trust, Liverpool Heart and Chest Hospital NHS Foundation Trust, Norfolk and Norwich University Hospitals NHS Foundation Trust, Royal Surrey NHS Foundation Trust, Sandwell and West Birmingham NHS Trust, West Suffolk NHS Foundation Trust, Somerset NHS Foundation Trust, Cambridge University Hospitals NHS Foundation Trust, Imperial College Healthcare NHS Trust

**Supplementary Table 2 | Demographical and clinical information of the UK data.** Part of the cohort demographics is not recorded by some NCCID partnership hospitals.

| Test Split   |             | Training and Validation Split |                  |          |                  |
|--------------|-------------|-------------------------------|------------------|----------|------------------|
|              |             | Non-contrast                  |                  | Contrast |                  |
|              |             | Real                          | Real + Synthetic | Real     | Real + Synthetic |
| Non-contrast | Sensitivity | 0.703                         | 0.784            | 0.324    |                  |
|              | Specificity | 0.961                         | 0.961            | 0.864    |                  |
|              | AUC         | 0.882                         | 0.921            | 0.655    |                  |
| Contrast     | Sensitivity | 0.269                         |                  | 0.914    | 0.810            |
|              | Specificity | 0.897                         |                  | 0.916    | 0.933            |
|              | AUC         | 0.667                         |                  | 0.979    | 0.931            |

**Supplementary Table 3 | COVID-19 pneumonia identification performance of CNN models trained on contrast and non-contrast split of NCCID dataset (UK).** "Real + Synthetic" means the training and validation images include the original split (non-contrast/contrast) as well as the synthesized ones from their counterpart (contrast/non-contrast) via CycleGAN. We conduct no modification on the test set.

| Method                                  | CouncilGAN    | ACL-GAN       | CycleGAN (ours) |
|-----------------------------------------|---------------|---------------|-----------------|
| Performance (Sensitivity / Specificity) | 0.458 / 0.692 | 0.524 / 0.279 | 0.703 / 0.784   |

**Supplementary Table 4 | Comparison on the unpaired image translation methods.**

| Radiologist Expert (Name Abbr.) |             | ZL   | LYM  | YZL  | COX  | HLM  | GC   | Majority Vote |
|---------------------------------|-------------|------|------|------|------|------|------|---------------|
| Healthy                         | sensitivity | 1    | 1    | 0.91 | 0.89 | 0.95 | 1    | 1             |
|                                 | specificity | 0.99 | 0.98 | 0.98 | 0.96 | 0.95 | 0.97 | 0.98          |
| COVID-19                        | sensitivity | 0.88 | 0.9  | 0.8  | 0.55 | 0.68 | 0.93 | 0.9           |
|                                 | specificity | 0.92 | 0.97 | 0.95 | 0.89 | 0.88 | 0.79 | 0.96          |
| Other viral pneumonia           | sensitivity | 0.1  | 0.35 | 0.3  | 0.05 | 0.3  | 0.05 | 0.2           |
|                                 | specificity | 0.97 | 0.96 | 0.94 | 0.88 | 0.89 | 1.0  | 0.97          |
| Bacterial pneumonia             | sensitivity | 0.83 | 0.68 | 0.85 | 0.8  | 0.69 | 0.75 | 0.83          |
|                                 | specificity | 0.9  | 0.91 | 0.87 | 0.89 | 0.95 | 1    | 0.91          |
| COVID vs non-COVID              | sensitivity | 0.88 | 0.90 | 0.55 | 0.80 | 0.68 | 0.93 | 0.90          |
|                                 | specificity | 0.92 | 0.97 | 0.89 | 0.95 | 0.88 | 0.79 | 0.96          |

**Supplementary Table 5 | Detailed diagnoses from radiologist.**

| Model                                   | 3D-ResNet50   | 3D-ResNet101  | 3D-Xception   | 3D-DenseNet (ours)   |
|-----------------------------------------|---------------|---------------|---------------|----------------------|
| Performance (Sensitivity / Specificity) | 0.888 / 0.500 | 0.894 / 0.512 | 0.831 / 0.525 | <b>0.926 / 0.538</b> |
| Model size (# Params)                   | 46.16 M       | 85.21 M       | 22.43 M       | <b>0.73 M</b>        |

**Supplementary Table 6 | Comparison on the 3D CNN models.**

| Model | 3D-ResNet50 | 3D-ResNet101 | 3D-Xception | 3D-DenseNet (ours) |
|-------|-------------|--------------|-------------|--------------------|
| FLOPs | 20.32G      | 30.31G       | 35.19G      | 143.50G            |

**Supplementary Table 7 | Computation cost of 3D CNN models.**



| Hold-out Data          | Cohorts<br>(Positive/Negative) | Performance (Sensitivity) |       |      |
|------------------------|--------------------------------|---------------------------|-------|------|
|                        |                                | Main Campus               | NCCID | FL   |
| Wuhan Union Hospital   | 506 / 0                        | 0.44                      | 0.53  | 0.66 |
| Wuhan Tianyou Hospital | 645 / 0                        | 0.42                      | 0     | 0.99 |

**Supplementary Table 8 | Model generalisation on the hold-out dataset.**

|               | Taxonomy<br>(Pneumonia type) | Main Campus     | Optical Valley  | Sino-French     | NCCID          | Federated       |
|---------------|------------------------------|-----------------|-----------------|-----------------|----------------|-----------------|
| Four<br>class | healthy - 0                  | [18, 11, 2, 49] | [27, 39, 0, 14] | [15, 22, 0, 43] | [68, 12, 0, 0] | [76, 1, 3, 0]   |
|               | covid - 1                    | [0, 45, 0, 35]  | [1, 77, 0, 2]   | [2, 71, 0, 7]   | [29, 51, 0, 0] | [1, 78, 1, 0]   |
|               | other viral - 2              | [0, 1, 0, 19]   | [1, 11, 0, 8]   | [1, 5, 0, 14]   | [13, 7, 0, 0]  | [0, 4, 5, 11]   |
|               | bacterial - 3                | [0, 20, 0, 58]  | [5, 40, 0, 15]  | [6, 14, 0, 40]  | [41, 19, 0, 0] | [14, 5, 12, 29] |
| Two<br>class  | non-covid - 0                | [146, 14]       | [70, 90]        | [119, 41]       | [122, 38]      | [150, 10]       |
|               | covid - 1                    | [35, 45]        | [3, 77]         | [9, 71]         | [29, 51]       | [2, 78]         |

**Supplementary Table 9 | Confusion matrices of locally/federatively trained models.**
